# Supplementary material for: Ecoresorbable smart fluids with controlled electroresponsive properties by various metal doping
Source: Royal Society of Chemistry journal article supplement (doi:10.1039/d0tc04036c), 2020-01-01
Supplement: d0tc04036c1.pdf [file d0tc04036c1.pdf]

Supporting Information for

**Ecoresorbable smart fluids with controlled electroresponsive  
properties by various metal doping**

Hyukjoon Gwon, Sohee Park and Seungae Lee\*

\*Department of Chemical Engineering, Konkuk University, 120 Neungdong-ro, Gwangjin-gu,  
Seoul 05029, Republic of Korea. Tel.: 82-2-2049-6109; E-mail: salee@konkuk.ac.kr

**1. High-magnification TEM image of the Mg-doped HNP.**

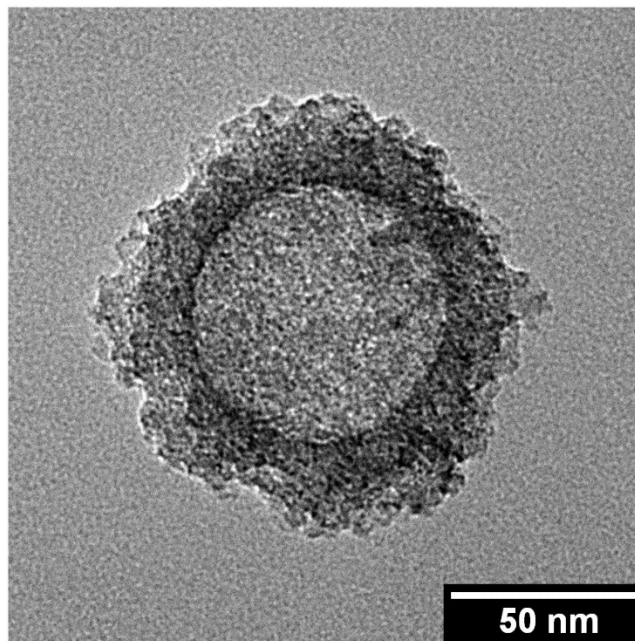

**Fig. S1** High-magnification TEM image of the Mg-doped HNPs.

## 2. SEM micrographs of various metal-doped HNPs.

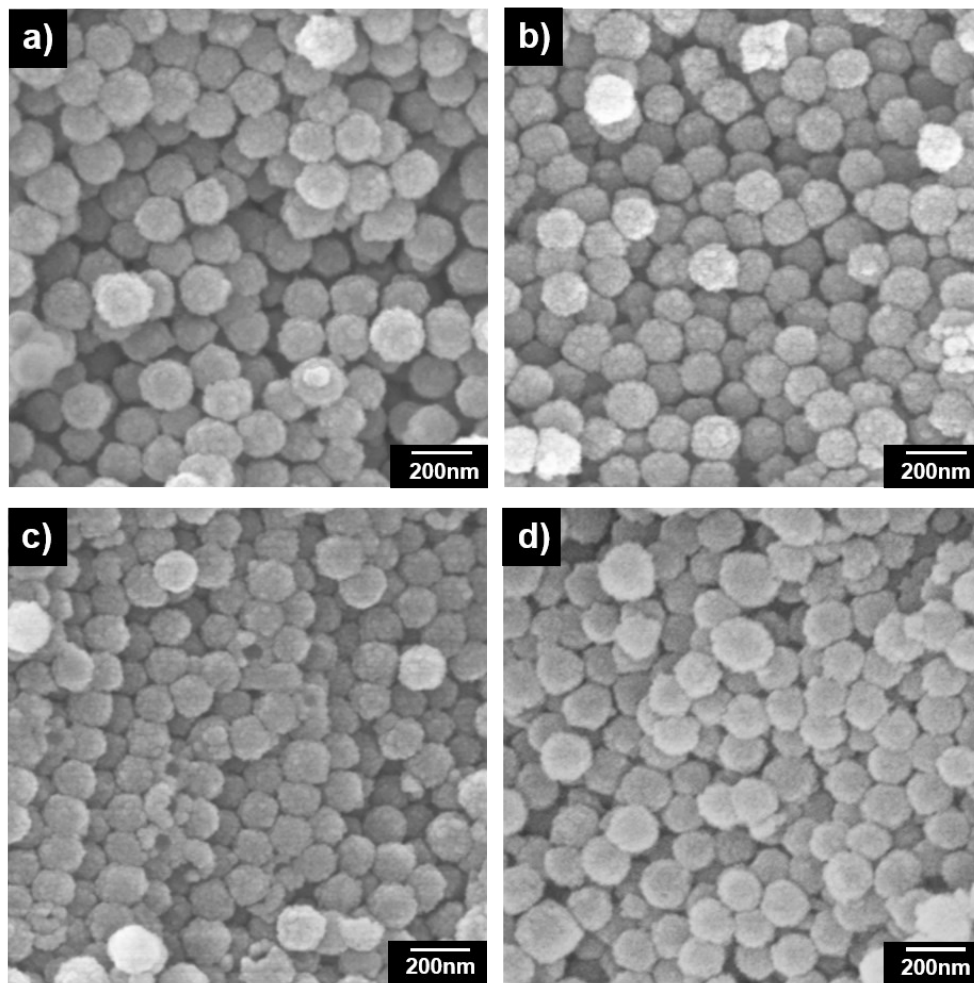

**Fig. S2** Field emission scanning electron microscope (FE-SEM) images of a) HNPs, b) Mg-doped HNPs, c) Zn-doped HNPs, and d) Fe-doped HNPs.

### 3. EDS mapping of various metal-doped HNPs.

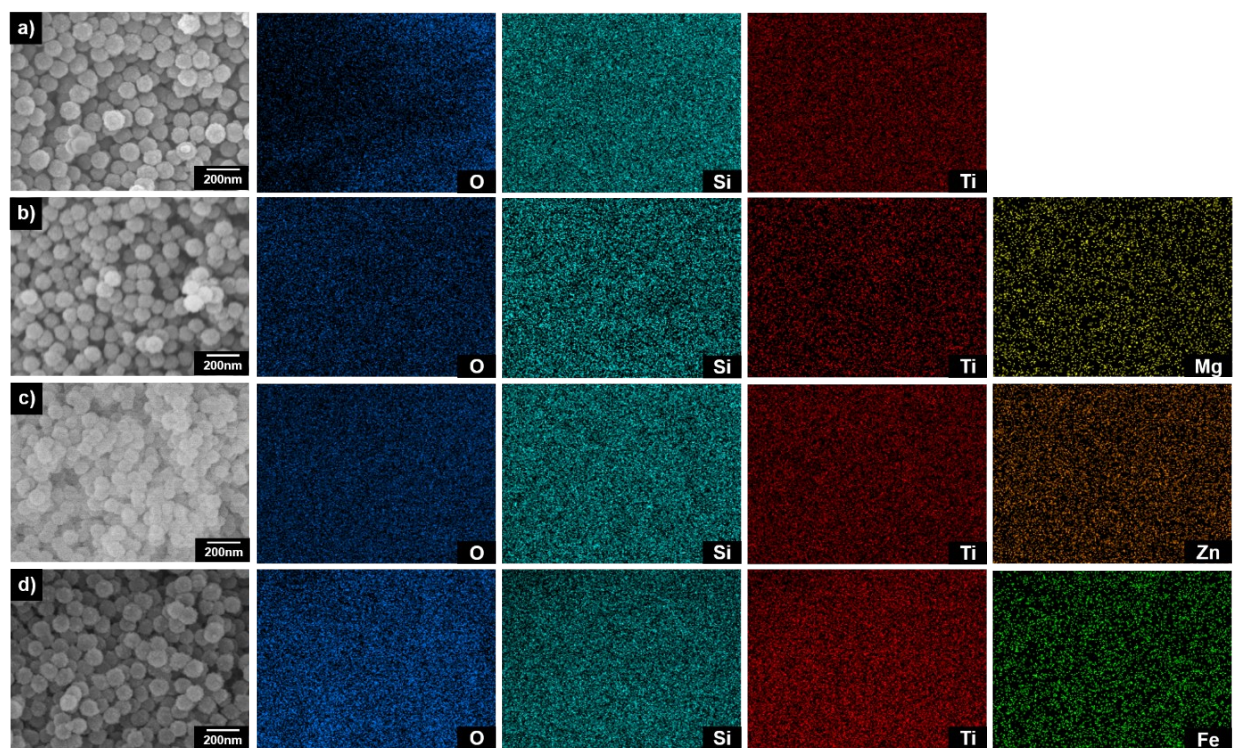

**Fig. S3** EDS mapping data of a) HNPs, b) Mg-doped HNPs, c) Zn-doped HNPs, and d) Fe-doped HNPs.

#### 4. XPS spectrum analysis of O 1s, Si 2p, and Ti 2p of various metal-doped HNPs.

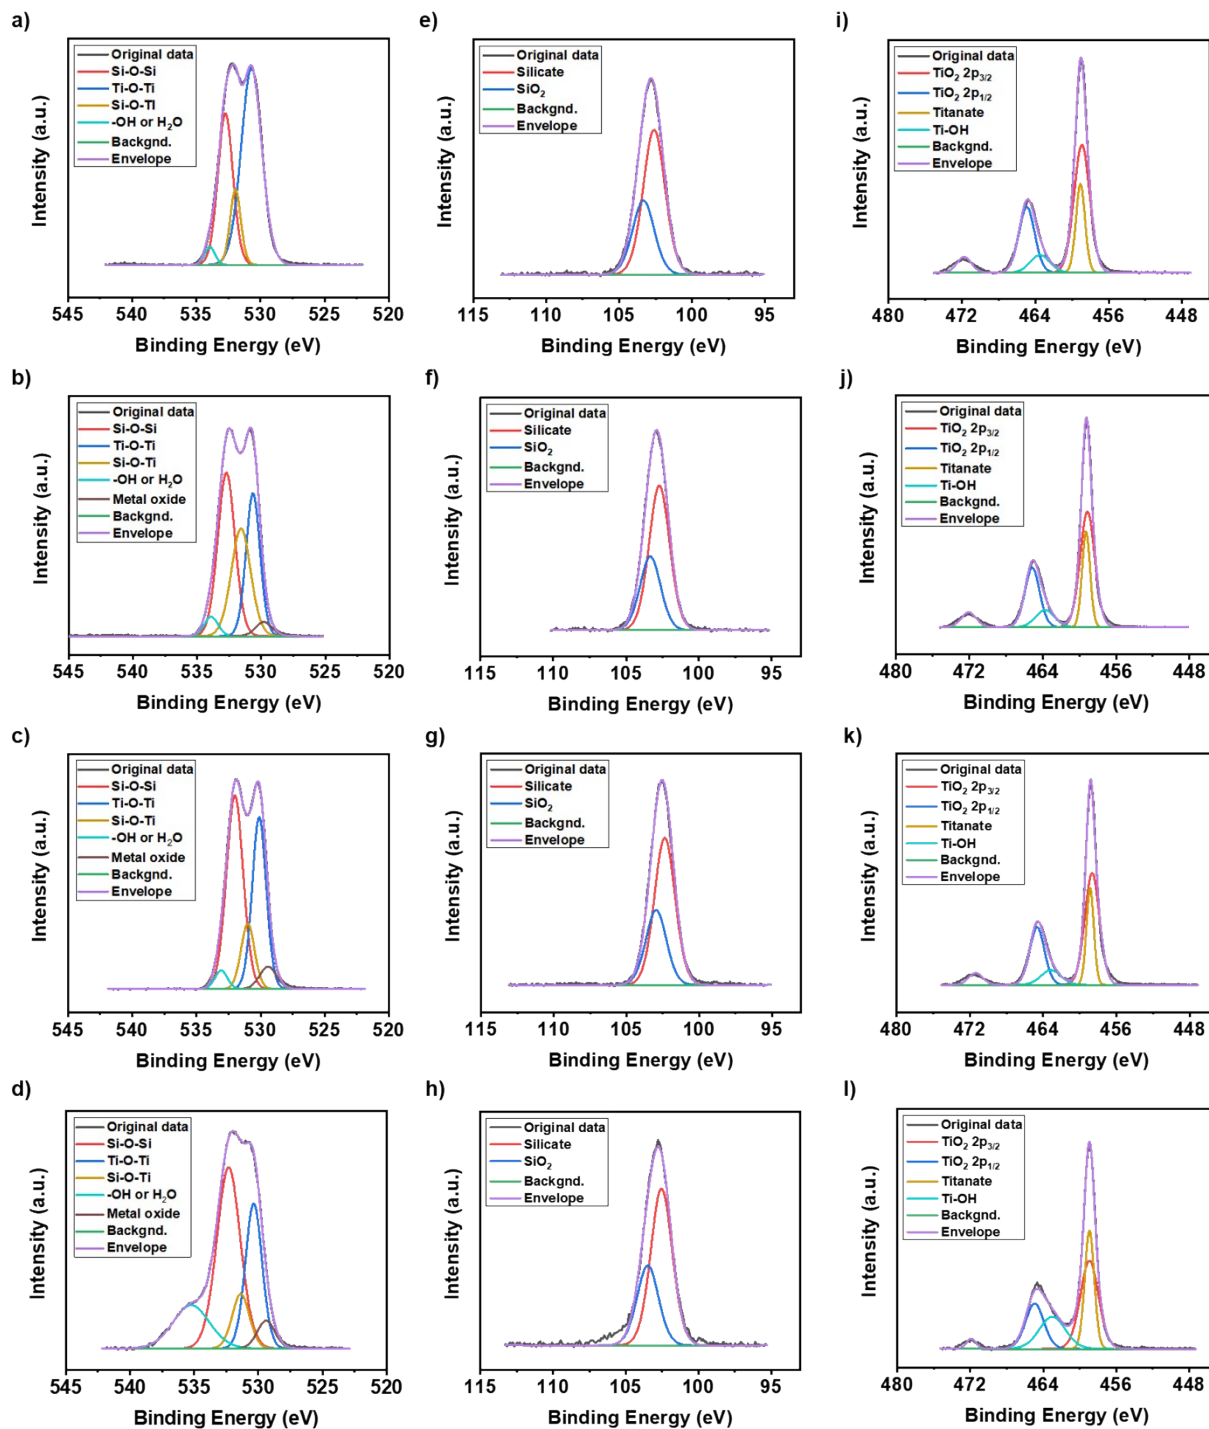

**Fig. S4** XPS O 1s spectra of a) HNP, b) Mg-HNP, c) Zn-HNP, d) Fe-HNP, respectively. XPS Si 2p spectra of e) HNP, f) Mg-HNP, g) Zn-HNP, h) Fe-HNP, respectively. XPS Ti 2p spectra of i) HNP, j) Mg-HNP, k) Zn-HNP, l) Fe-HNP, respectively.

5. Shear viscosity of various metal-doped HNPs as a function of shear rate.

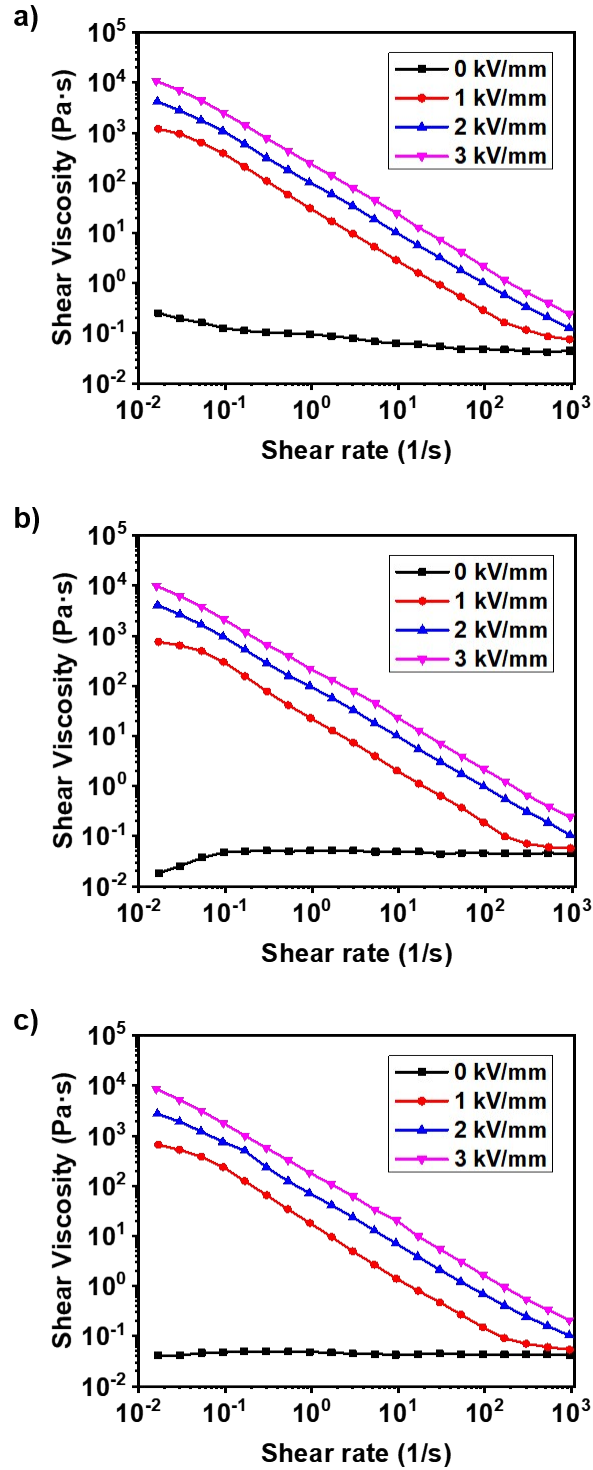

**Fig. S5** Shear viscosity of a) Mg, b) Zn, and c) Fe-doped HNP-based ER fluids as a function of shear rate.

## 6. Relative permittivity of soybean oil .

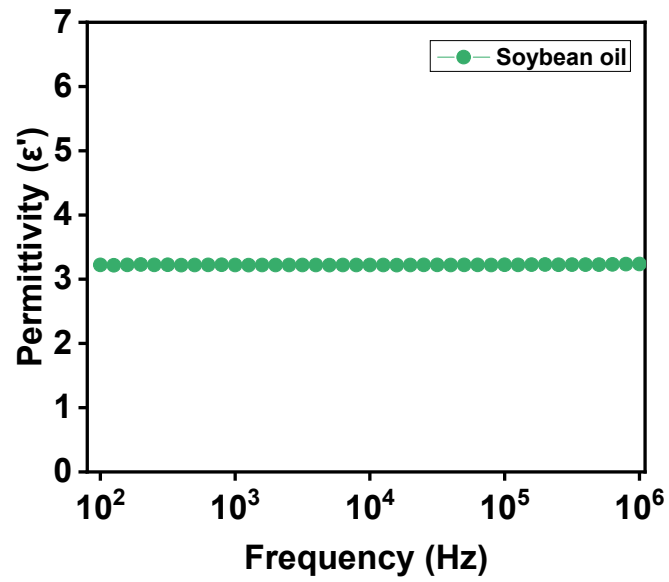

**Fig. S6** The permittivity as a function of electric field frequency for soybean oil.

7. Optical microscope images of the structural transition of HNP-, Mg-doped HNP- and Zn-doped HNP-based ER fluids.

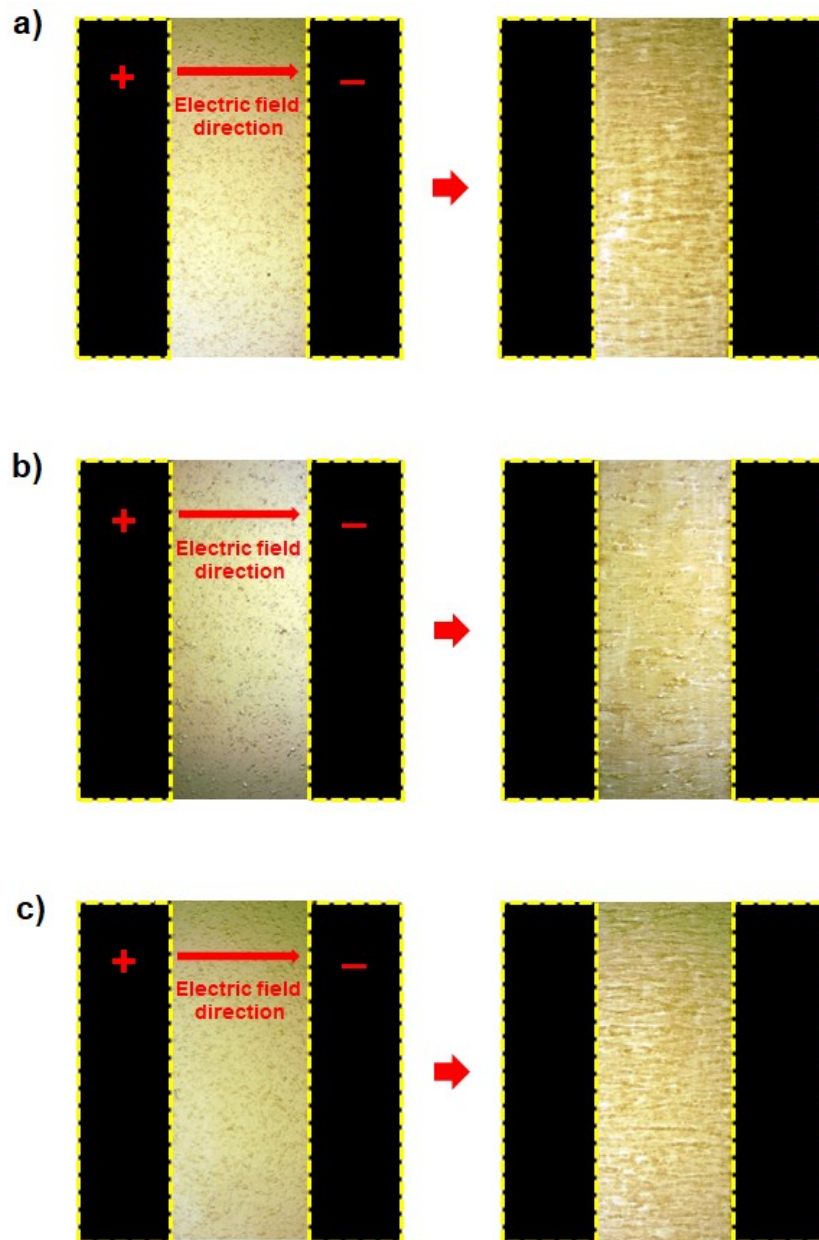

**Fig. S7** Optical microscope images of a) HNP-, b) Mg-doped HNP-, and c) Zn-doped HNP-based ER fluids under the external electric field of  $0.5 \text{ kV mm}^{-1}$ . The gap between two electrodes was fixed as 1.0 mm.



## 8. Physical parameters of HNPs and metal-doped HNPs-based ER fluids.

**Table S1.** Physical parameters and sedimentation velocity of HNPs and metal-doped HNPs in soybean oil.

| Samples       | Particle diameter <sup>a</sup> (nm) | Particle density <sup>b</sup> (g cm <sup>-3</sup> ) | Fluid density <sup>c</sup> (g cm <sup>-3</sup> ) | Fluid viscosity <sup>c</sup> (Pa s) | Sedimentation velocity <sup>d</sup> (m s <sup>-1</sup> ) |
|---------------|-------------------------------------|-----------------------------------------------------|--------------------------------------------------|-------------------------------------|----------------------------------------------------------|
| HNPs          | 115                                 | 1.52                                                | 0.92                                             | 0.054                               | 8.288×10 <sup>-13</sup>                                  |
| Mg-doped HNPs | 115                                 | 1.61                                                | 0.92                                             | 0.054                               | 9.571×10 <sup>-13</sup>                                  |
| Zn-doped HNPs | 115                                 | 1.81                                                | 0.92                                             | 0.054                               | 1.226×10 <sup>-12</sup>                                  |
| Fe-doped HNPs | 115                                 | 1.85                                                | 0.92                                             | 0.054                               | 1.289×10 <sup>-12</sup>                                  |

<sup>a</sup> The average diameter of the HNPs and the metal-doped HNPs were determined by TEM analysis.

<sup>b</sup> The density of the HNPs and the metal-doped HNPs were measured by pycnometry at 24 °C.

<sup>c</sup> Soybean oil was used as the dispersing medium. Density and viscosity values of soybean oil were taken from previously published work.<sup>1,2</sup>

<sup>d</sup> The sedimentation velocity was calculated using Stokes' equation.

## 9. References

- 1 H. Nouredini, B. C. Teoh and L. Davis Clements, *J. Am. Oil Chem. Soc.*, 1992, **69**, 1184–1188.
- 2 H. Nouredini, B. C. Teoh and L. Davis Clements, *J. Am. Oil Chem. Soc.*, 1992, **69**, 1189–1191.
